# Supplementary material for: Boosting the catalytic performance of Ru nanoparticles in the cleavage of β-O-4 linkages in lignin by doping Mo
Source: Royal Society of Chemistry journal article supplement (doi:10.1039/d4gc00294f), 2024-01-01
Supplement: d4gc00294f1.pdf [file d4gc00294f1.pdf]

## Supporting Information

### **Boosting the Catalytic Performance of Ru Nanoparticles on the Cleavage of $\beta$ -O-4 Linkage in Lignin by Doping Mo**

Puyi Lei, Jiali Zhang, Wenzhuo Shen, Min Zhong, and Shouwu Guo\*

Department of Electronic Engineering, School of Electronic Information and Electrical  
Engineering, Shanghai Jiao Tong University, Shanghai 200240, P. R. China.

\*Correspondences should be addressed to: [swguo@sjtu.edu.cn](mailto:swguo@sjtu.edu.cn)

## Chemical reagents

Graphene oxide (GO) was prepared following the procedure described in our previous work<sup>1</sup>. Birch organosolv lignin extracted from commercially available pet birch sawdust following also a procedure we previous reported<sup>2</sup>. Briefly, 20 g crushed birch sawdust wrapped within filter paper was put into a Soxhlet extractor, and a mixture of 15 mL 2M HCl and 150 mL 1,4-dioxane was used as solvent. The solvent was heated to reflux under an atmosphere of N<sub>2</sub> for 1h. The mixture was then cooled and filtrated to acquire the slimy liquor. The collected liquor was then rotary evaporated to get a concentrated sticky residue. The residue was firstly dissolved into a mixture of 225 mL acetone and 25 mL water, and then 250 mL water was added with rapid stirring. The crude lignin was precipitated gradually, and was collected by vacuum filtration. Finally, the crude lignin was dissolved into a mixture of 9 mL acetone and 1 mL methanol, and the mixture was dropwise added into a flask with 200 mL diethyl ether under vigorously stirring. The pure lignin was precipitated, filtrated, dried under vacuum to obtain organosolv lignin (1.93 g, 9.7% yield).

**Table S1****Table S1** Chemical reagents used in the work

| Reagent                                   | Purity          | Producer                                  |
|-------------------------------------------|-----------------|-------------------------------------------|
| NaBH <sub>4</sub>                         | 99%             |                                           |
| CH <sub>3</sub> CN                        | HPLC            |                                           |
| methanol                                  | HPLC            |                                           |
| ethanol                                   | 95% & anhydrous | Sinopharm<br>Chemical Reagent Co.<br>Ltd. |
| benzoic acid                              | AR              |                                           |
| phenol                                    | AR              |                                           |
| acetic acid                               | AR              |                                           |
| <i>tert</i> -butanol                      | CP              |                                           |
| 2,2,6,6-tetramethylpiperidine<br>(TEMP)   | 98%             |                                           |
| RuCl <sub>3</sub> ·3H <sub>2</sub> O      | 99.99%          |                                           |
| 5,5-dimethyl-1-pyrroline<br>N-oxide(DMPO) | 97%             | Bide Pharmatech Co. Ltd.                  |
| 4-methoxyphenol                           | 99%             |                                           |
| 2-phenoxy-1-phenylethanol                 | 97%             |                                           |
| MoCl <sub>5</sub>                         | 99.5%           | Meryer Chemical<br>Technology Co. Ltd.    |
| sodium citrate                            | 98%             | Aladdin Bio-Chem                          |

|                              |                    |                                                        |
|------------------------------|--------------------|--------------------------------------------------------|
| $\beta$ -carotene            | 96%                | Technology Co. Ltd.                                    |
| <i>iso</i> -propanol         | AR                 |                                                        |
| 2-phenoxyacetophenone        | 98%                |                                                        |
| benzoylformic acid           | 95%                |                                                        |
| 3,4-dimethoxybenzoic acid    | 99%                |                                                        |
| 3,5-dimethoxyphenol          | 98%                |                                                        |
| 3,4,5-trimethoxybenzoic acid | 99%                |                                                        |
| 4-methoxybenzyl alcohol      | 97%                | Shanghai Wokai<br>Pharmaceutical Co. Ltd.              |
| veratryl alcohol             | 98%                | Sun Chemical<br>Technology (Shanghai)<br>Co. Ltd.      |
| <i>p</i> -anisic acid        | 99%                | Shanghai Macklin<br>Biochemical Technology<br>Co. Ltd. |
| silicon standard             | 99.9% metals basis |                                                        |

**Figure S1**

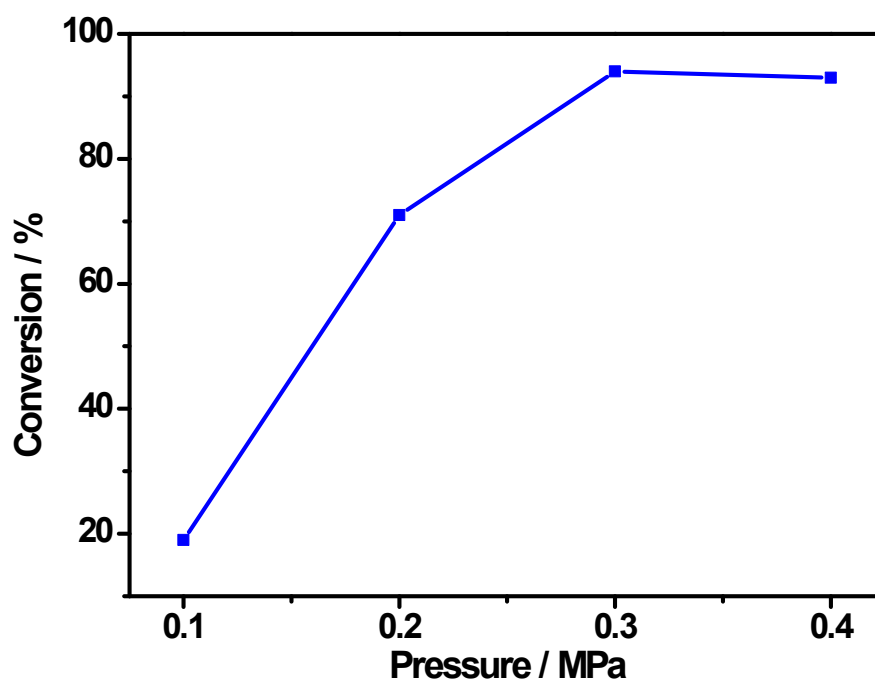

**Figure S1** Effects of the O<sub>2</sub> Pressure on the oxidative oxidative cleavage of  $\beta$ -O-4 linkage. Condition: 0.2 mg RuMo/rGO (10-1), 0.1 mmol 2-phenoxy-1-phenylethanol, pH =12, 12h. Reactions were filled with different pressure oxygen previously.

**Figure S2**

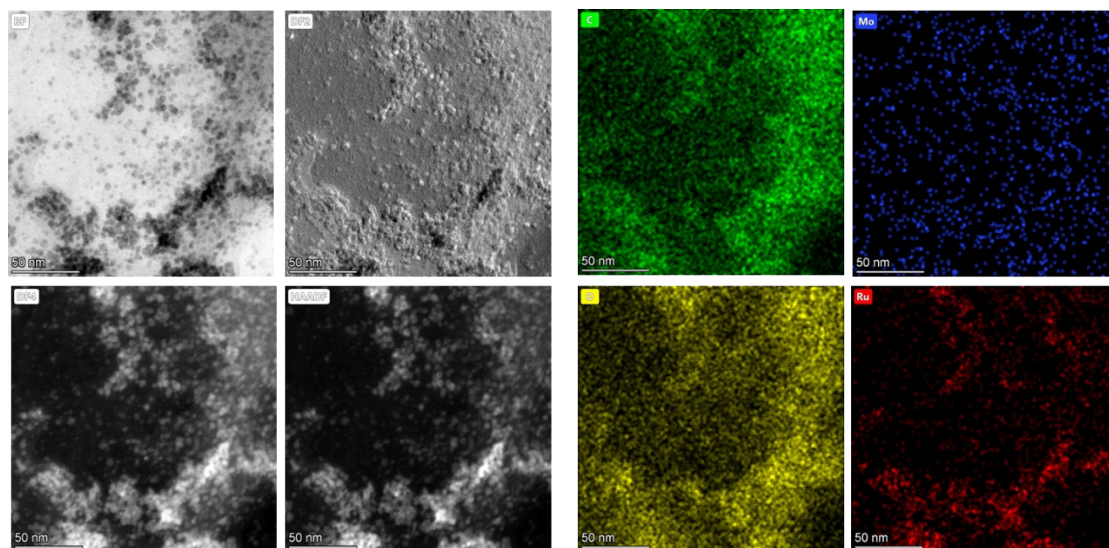

**Figure S2** STEM images and element mappings of RuMo/rGO(10-1).

Figure S3

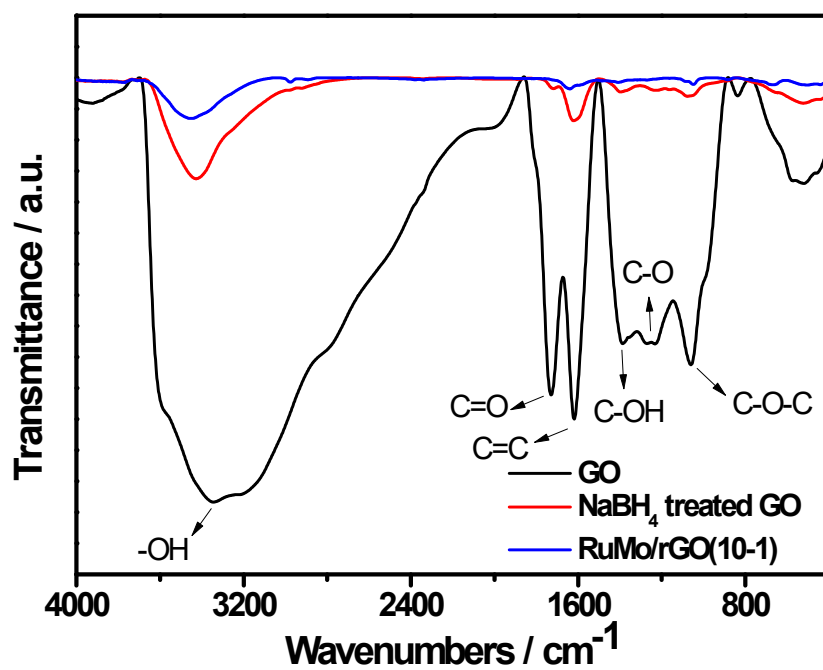

Figure S3 FTIR spectra of GO, reduced GO (rGO) with NaBH<sub>4</sub>, and RuMo/rGO(10-1), respectively.

Table S2

**Table S2**  $g$  factor value of EPR spectra

| Entry | Catalyst                   | Trapping Agent | $g^a$          |
|-------|----------------------------|----------------|----------------|
| 1     | Mo-rGO                     | TEMP           | 2.0075         |
| 2     | Ru-rGO                     | TEMP           | 2.0074         |
| 3     | RuMo/rGO(10-1)             | TEMP           | 2.0062         |
| 4     | rGO                        | TEMP           | 2.0061         |
| 5     | bare RuMo<br>nanoparticles | TEMP           | / <sup>b</sup> |
| 6     | rGO                        | DMPO           | 2.0064         |
| 7     | RuMo/rGO(10-1)             | DMPO           | 2.0063         |
| 8     | bare RuMo<br>nanoparticles | DMPO           | / <sup>b</sup> |

<sup>a</sup>obtained by the midpoint of the  $g$  factor-intensity illustrated in Figure S5. <sup>b</sup>No signal observed.



**Figure S4**

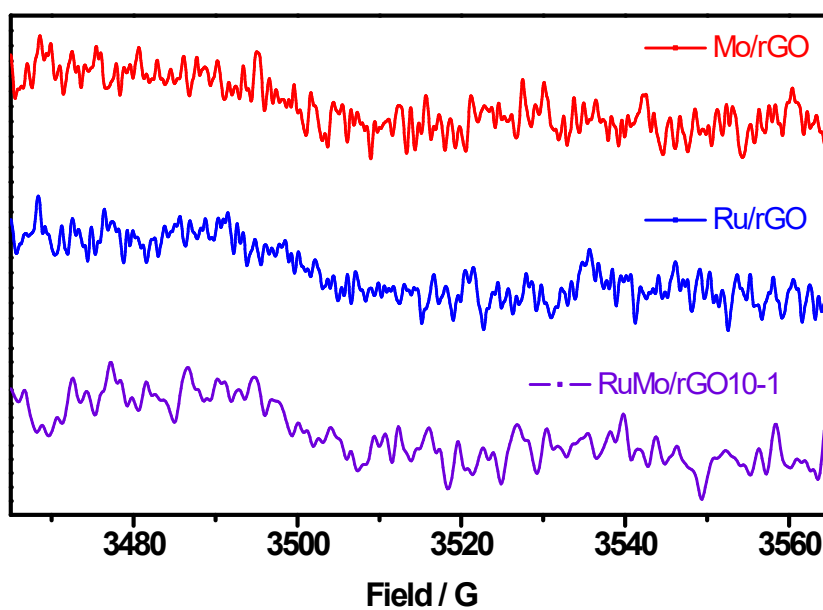

**Figure S4** EPR spectra of DMPO (5%) in the presences of Mo/rGO, Ru/rGO, and RUMo/rGO(10-1) composites. Condition: 0.2 mg composite, 0.3 MPa O<sub>2</sub>, 100°C, 0.5h, pH=12, 3 mL deionized water as solvent.

Figure S5

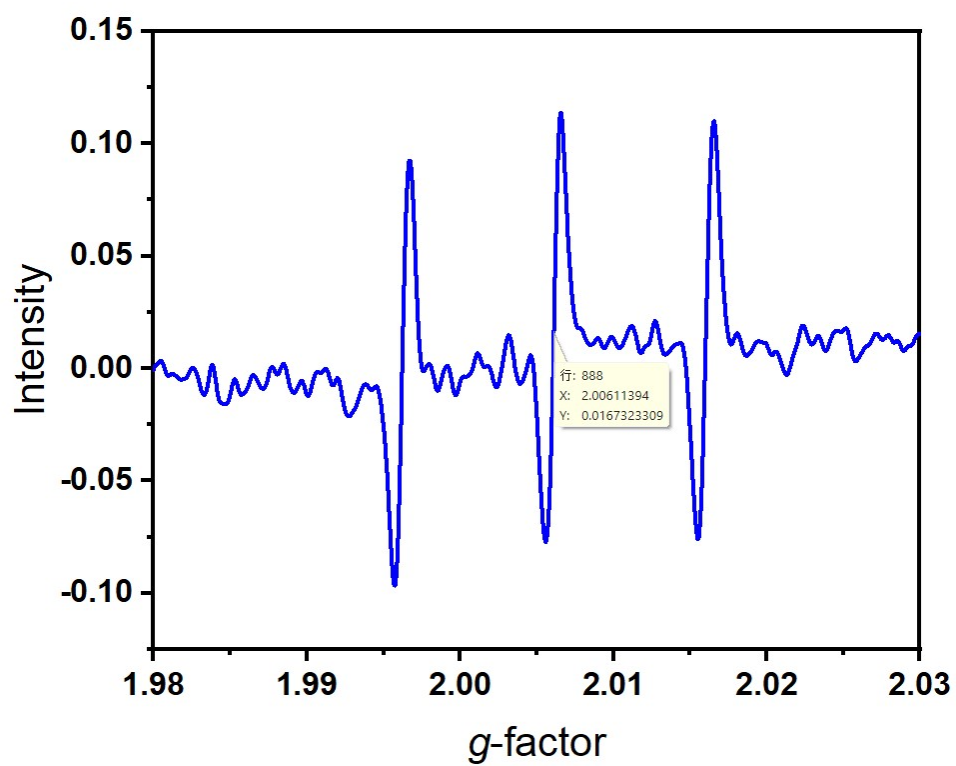

Figure S5 Diagrammatic illustration for  $g$  factor acquisitions (Table S2, entry 4).

**Figure S6**

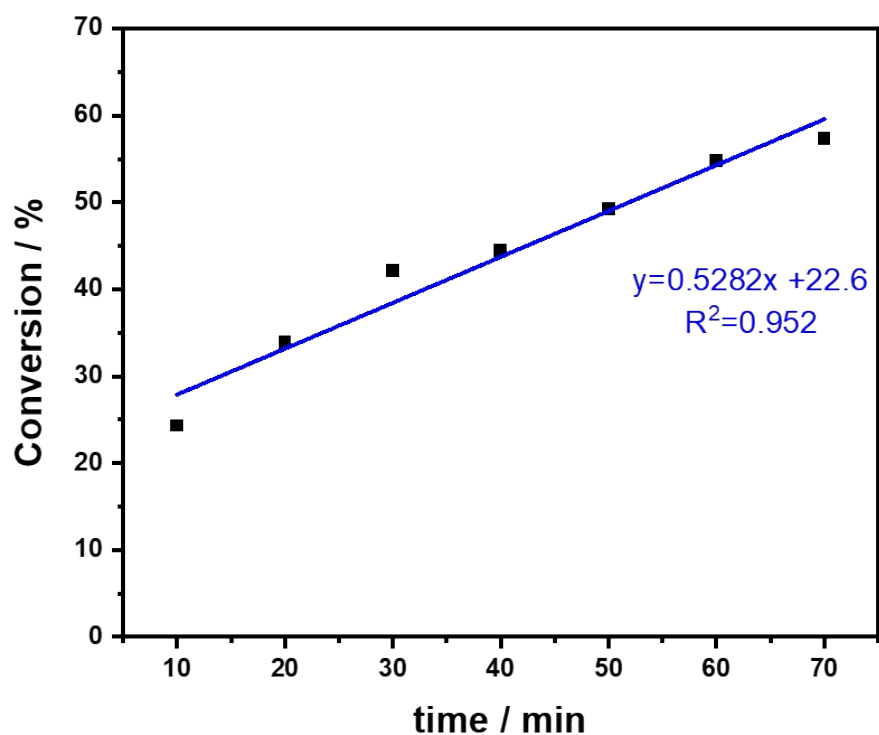

**Figure S6** Operando-monitoring results of the oxidation reaction of 2-phenoxy-1-phenylethanol. Reaction conditions: 0.025 mmol 2-phenoxy-1-phenylethanol, 0.5 mg RuMo/rGO(10-1)(26.9% Ru, 4.3% Mo, calculated from ICP results), 5 mL deionized water, 0.3 MPa O<sub>2</sub>, pH=12, 100°C, 12h. Reaction was operando-monitored by HPLC.

**. Table S3**

**Table S3** Comparison on the reaction conditions for the oxidation cleavages of 2-phenoxy-1-phenylethanol using different catalysts

| Entry | Catalyst                         | Base | Oxidant                | Solvent          | Temp. / °C | Time / h | Conv. / % | TOF <sup>h</sup> / h <sup>-1</sup> | Ref.      |
|-------|----------------------------------|------|------------------------|------------------|------------|----------|-----------|------------------------------------|-----------|
| 1     | RuMo/rGO(10-1) <sup>a</sup>      | NaOH | 0.3 MPa O <sub>2</sub> | H <sub>2</sub> O | 100        | 12       | 99        | 5.5                                | This work |
| 2     | Co/NG@3dNG-900 <sup>b</sup>      | -    | 0.3 MPa O <sub>2</sub> | Methanol         | 120        | 4        | 100       | 1.0                                | [2]       |
| 3     | Au/CeO <sub>2</sub> <sup>c</sup> | -    | 1 MPa O <sub>2</sub>   | Methanol         | 180        | 4        | 71.5      | 14.8                               | [3]       |
| 4     | Au-Pd-CTF <sup>d</sup>           | -    | 0.5 MPa O <sub>2</sub> | Methanol         | 160        | 4        | 96        | 19.4 <sup>i</sup>                  | [4]       |
| 5     | Pd/CeO <sub>2</sub> <sup>e</sup> | -    | 0.1 MPa O <sub>2</sub> | Methanol         | 185        | 24       | 64        | 0.6                                | [5]       |
| 6     | Co-N-C <sup>f</sup>              | NaOH | 1 MPa Air              | Methanol         | 150        | 4        | 93        | 4.4                                | [6]       |
| 7     | WO <sub>3</sub> <sup>g</sup>     | NaOH | TBHP                   | H <sub>2</sub> O | 80         | 3        | 97        | 1.6                                | [7]       |

Reaction conditions: <sup>a</sup>0.025 mmol 2-phenoxy-1-phenylethanol, 0.5 mg

RuMo/rGO(10-1)(26.9% Ru, 4.3% Mo, calculated from ICP results), 3 mL deionized

water, 0.3 MPa O<sub>2</sub>, pH=12, 100°C, 12h. <sup>b</sup>0.01 mmol 2-phenoxy-1-phenylethanol, 3

mg Co/NG@3dNG-900 (25.7 mol% of Co to 2-phenoxy-1-phenylethanol), 3 mL

CH<sub>3</sub>OH, 0.3 MPa O<sub>2</sub>, 120 °C, 4 h. <sup>c</sup>0.47 mmol 2-phenoxy-1-phenylethanol, 20 mg

Au/CeO<sub>2</sub> (0.88 wt% of Au), 25 mL CH<sub>3</sub>OH, 1 MPa O<sub>2</sub>, 180 °C, 4 h. <sup>d</sup>0.2 mmol 2-

phenoxy-1-phenylethanol, 40 mg Au-Pd-CTF, 5 mL CH<sub>3</sub>OH, 0.5 MPa O<sub>2</sub>, 160 °C, 4

h. <sup>e</sup>0.6 mmol 2-phenoxy-1-phenylethanol, 0.2 g Pd/CeO<sub>2</sub> (1.5 wt% of Pd), 50 mL

CH<sub>3</sub>OH, 0.1 MPa O<sub>2</sub>, 185 °C, 24 h. <sup>f</sup>0.2 mmol 2-phenoxy-1-phenylethanol, 20 mg Co-

N-C (3.1 wt%), 0.2 mmol NaOH, 5 mL CH<sub>3</sub>OH, 1 MPa air, 150 °C, 4 h. <sup>g</sup>0.5 mmol 2-

phenoxy-1-phenylethanol, 0.1 mmol nano WO<sub>3</sub>, 3.9 mmol TBHP (70%), 4.8 mmol

NaOH (24%), 80 °C, 3 h. <sup>h</sup>The turnover frequency (TOF) was estimated or calculated

from data provided in the original articles. TOF of catalyst is calculated as the mmol

of 2-phenoxy-1-phenylethanol consumed by 1 mmol of active metal/metal oxide in

the catalyst (active metal/metal oxide loading) per hour. <sup>i</sup>Given by original literature.

**Figure S7**

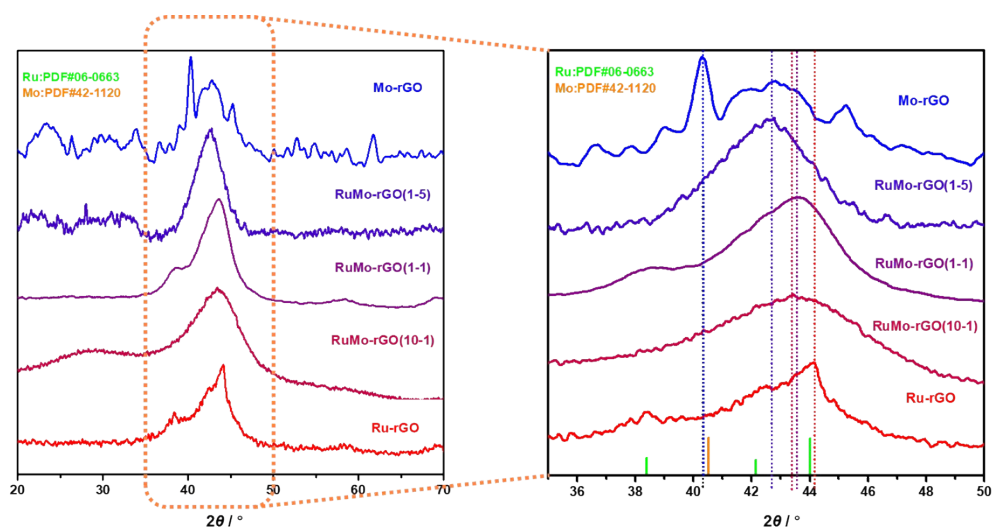

**Figure S7** XRD patterns of RuMo/rGO composites with different Ru to Mo ratios.

Figure S7b is enlarged pattern of Figure S7a at  $2\theta = 35-50^\circ$ . The patterns were normalized using silicon as internal standard (5% wt).

**Figure S8**

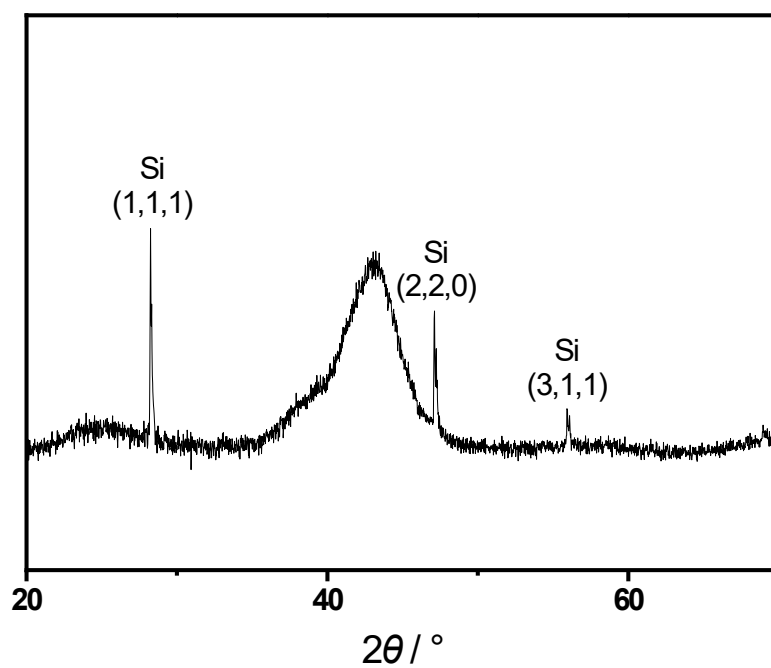

**Figure S8** XRD patterns of RuMo/rGO(10-1) with 5% wt. of silicon as internal standard agent.

**Table S4**

**Table S4.** Detailed Ru and Mo contents in the RuMo/rGO composites determined with ICP-OES measurement and the feeding ratios of Ru and Mo during the fabrications

| <b>Entr</b><br><b>y</b>                                  | 1                  | 2                 | 3                 | 4                 | 5                 | 6                 | 7                      |
|----------------------------------------------------------|--------------------|-------------------|-------------------|-------------------|-------------------|-------------------|------------------------|
| <b>Sam</b><br><b>ple</b>                                 | RuMo/rG<br>O(10-1) | RuMo/r<br>GO(5-1) | RuMo/r<br>GO(3-1) | RuMo/r<br>GO(1-1) | RuMo/r<br>GO(1-3) | RuMo/r<br>GO(1-5) | RuMo/r<br>GO(1-<br>10) |
| <b>Feed</b><br><b>Ratio</b><br><b>(Ru:</b><br><b>Mo)</b> | 10:1               | 5:1               | 3:1               | 1:1               | 1:3               | 1:5               | 1:10                   |
| <b>ICP</b><br><b>Ratio</b><br><b>(Ru:</b><br><b>Mo)</b>  | 6.25:1             | 5.66:1            | 4.03:1            | 1.31:1            | 1:1.20            | 1:2.98            | 1:15.48                |



**Figure S9**

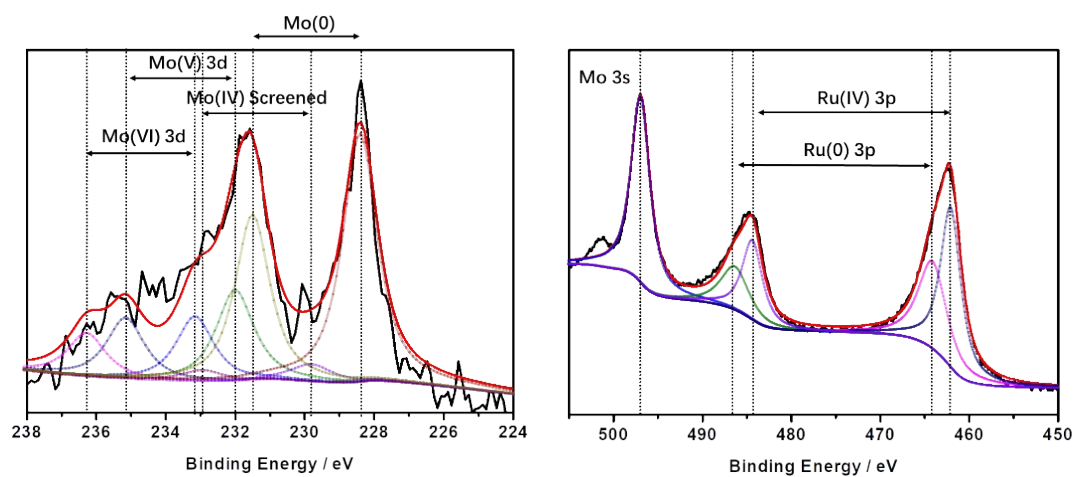

**Figure S9** XPS spectra of Mo 3d and Ru 3p of RuMo/rGO(10-1).

**Table S5****Table S5** XPS data of RuMo/rGO(10-1).

|          | <b>Peak</b>   | <b>Binding energy /<br/>eV</b> | <b>FWHM / eV</b> | <b>Distribution</b> |
|----------|---------------|--------------------------------|------------------|---------------------|
| Mo(VI)   | <i>3d 5/2</i> | 236.3                          | 1.29             | 16%                 |
|          | <i>3d 3/2</i> | 233.2                          | 1.29             |                     |
| Mo(V)    | <i>3d 5/2</i> | 235.2                          | 1.29             | 23%                 |
|          | <i>3d 3/2</i> | 232.0                          | 1.29             |                     |
| Mo(IV)   | <i>3d 5/2</i> | 232.9                          | 1.49             | 5%                  |
| Screened | <i>3d 3/2</i> | 229.8                          | 1.49             |                     |
| Mo(0)    | <i>3d 5/2</i> | 231.5                          | 1.19             | 56%                 |
|          | <i>3d 3/2</i> | 228.4                          | 1.19             |                     |
| Ru(IV)   | <i>3p 1/2</i> | 484.3                          | 2.73             | 43%                 |
|          | <i>3p 3/2</i> | 462.1                          | 2.73             |                     |
| Ru(0)    | <i>3p 1/2</i> | 486.3                          | 3.78             | 57%                 |
|          | <i>3p 3/2</i> | 464.1                          | 3.78             |                     |
| Mo       | <i>3s</i>     | 497.0                          | 2.49             | /                   |

**Table S6****Table S6** Retention time ( $t_R$ ) and mobile phase information of HPLC measurement

| Reagent                                | $t_R^a$ / min | Mobile phase (A: 0.5% aqueous acetic acid; B: acetonitrile) <sup>b</sup> / % |    |
|----------------------------------------|---------------|------------------------------------------------------------------------------|----|
|                                        |               | A                                                                            | B  |
| 2-phenoxy-1-phenylethanol ( <b>1</b> ) | 14.2          | 60                                                                           | 40 |
| <b>2</b>                               | 13.8          | 60                                                                           | 40 |
| <b>3</b>                               | 14.5          | 60                                                                           | 40 |
| <b>4</b>                               | 13.5          | 60                                                                           | 40 |
| <b>5</b>                               | 15.5          | 60                                                                           | 40 |
| <b>6</b>                               | 11.3          | 60                                                                           | 40 |
| <b>7</b>                               | 13.0          | 60                                                                           | 40 |
| 2-phenoxy-1-phenylethan-1-one          | 18.6          | 60                                                                           | 40 |
| $\alpha$ -hydroxyacetophenone          | 2.9           | 60                                                                           | 40 |
| benzoic acid                           | 7.7           | 60                                                                           | 40 |
| phenol                                 | 6.3           | 60                                                                           | 40 |
| <i>p</i> -benzoquinone                 | 3.67          | 60                                                                           | 40 |
| guaiacol                               | 6.0           | 60                                                                           | 40 |
| 4-methoxyphenol                        | 7.7           | 60                                                                           | 40 |

|                                     |     |    |    |
|-------------------------------------|-----|----|----|
| 3,5-dimethoxyphenol                 | 6.3 | 60 | 40 |
| veratric acid                       | 5.0 | 60 | 40 |
| 3,4,5-<br>trimethoxybenzoic<br>acid | 7.8 | 60 | 40 |

---

<sup>a</sup> $t_R \pm 0.1$  min. The data were acquired at  $\lambda = 273$  nm, and calibrated using internal standard method. <sup>b</sup>Solvent was previously mixed and pre-heated to 25°C to avoid endothermal disturbance during mixing acetonitrile and water.

**Figure S10**

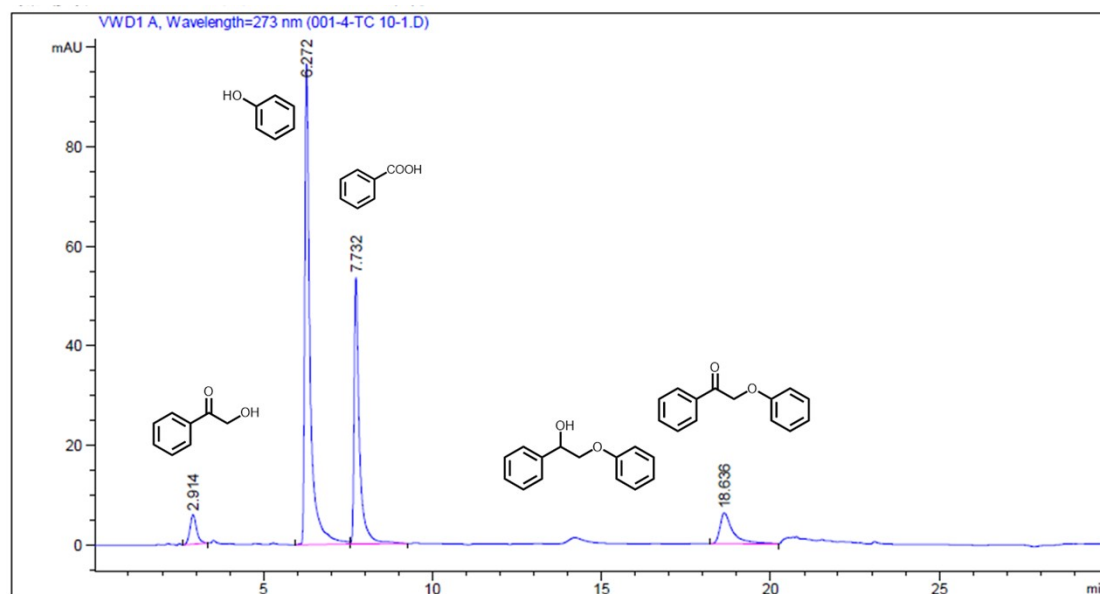

**Figure S10** HPLC spectrum of 2-phenoxy-1-phenylethanol oxidation reaction catalyzed by RuMo/rGO(10-1). Reaction conditions: 0.2 mg RuMo/rGO(10-1), 0.01mmol 2-phenoxy-1-phenylethanol, 0.3 MPa O<sub>2</sub>, 100°C, 12h, pH =12, detection wavelength = 273 nm, using CH<sub>3</sub>CN: 0.5% CH<sub>3</sub>COOH = 40:60, v/v as mobile phase. The reaction solution was previously neutralized by 0.1M HCl, filtrated, attenuated to corresponding mobile phase solvent ratio (CH<sub>3</sub>CN:0.5% CH<sub>3</sub>COOH = 40:60, v/v) with CH<sub>3</sub>CN, and then used for HPLC. Products were identified using internal standard method with corresponding reagents as internal standard substances.

**Figure S11**

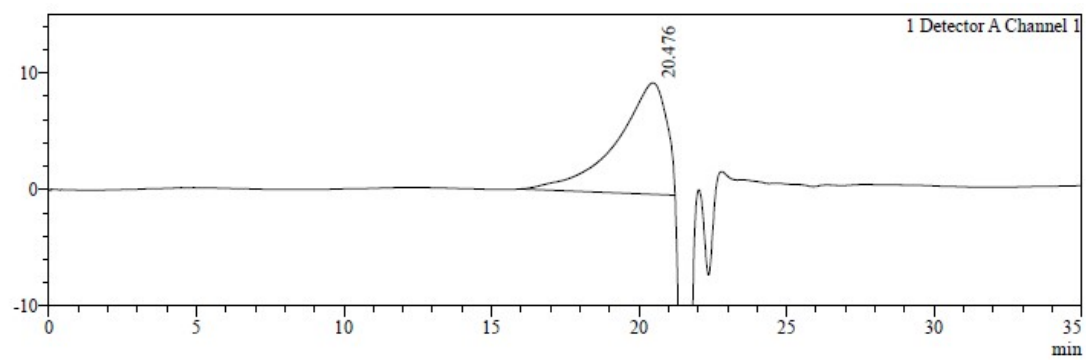

**Figure S11** GPC data of as-extracted organosolv lignin using DMF as eluent.

**Figure S12**

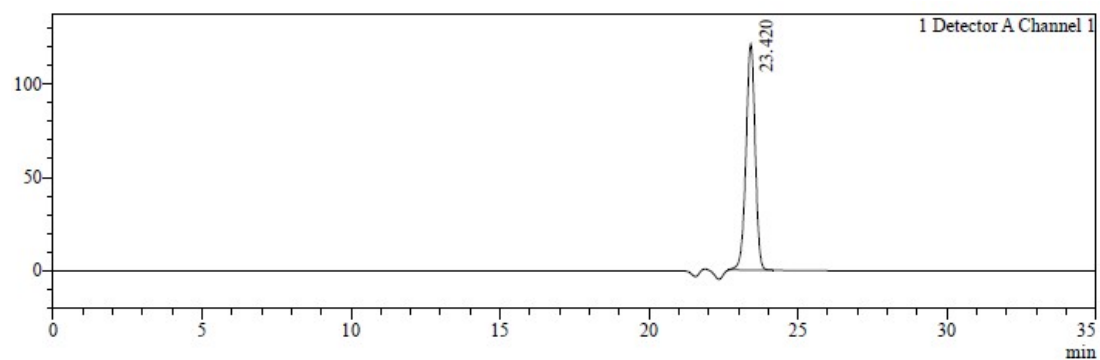

**Figure S12** GPC data of organosolv lignin after the oxidation depolymerization with the RuMo/rGO(10-1) as catalyst and using DMF as eluent. Reaction conditions: 10 mg as-extracted organosolv lignin, 1 mg RuMo/rGO(10-1), 3 mL water, 0.3 MPa O<sub>2</sub>, 100°C, 12 h, pH = 12.

**Computational Details :** Vienna Ab initio Simulation Package (VASP)<sup>8-11</sup> was utilized to perform DFT within periodic models in this work. Generalized gradient approximation (GGA)<sup>12</sup> with projector augmented wave (PAW)<sup>13, 14</sup> method was applied in calculations to better simulate the electronic states and the core-electron interaction of the catalysts. The cutoff energy was set to be 450 eV. Spin polarization effect was considered in this work. The lattice parameters of graphite were optimized, and the results are consistent with experiments. The optimized cells were used to construct single-layer 6×6 graphene model and the structures with Ru and RuMo alloy clusters on the graphene. Herein, the metal cluster consisting of totally 30 metal atoms, for pure Ru cluster containing 30 Ru atoms, for RuMo is composed of 27 Ru atoms and 3 Mo atoms to simulate the RuMo/rGO(10-1). The Ru (0,0,1) lattice was used during the simulation in consideration of high ratio between Ru and Mo. Structural optimizations were performed until the residual forces on each ion converged to smaller than 0.05 eV Å<sup>-1</sup>. Gamma k-points was used to describe the surface Brillouin zone. The width of vacuum layer was set larger than 12 Å to avoid spurious interaction.

The adsorption energies of intermediate species on the considered slabs are defined as:

$$E_{\text{ads}} = E_{\text{slab+molec}} - E_{\text{slab}} - E_{\text{molec(g)}}$$

where  $E_{\text{slab+molec}}$  means the total energy of slab and adsorbed species,  $E_{\text{slab}}$  denotes the slab energy, and  $E_{\text{molec(g)}}$  represents the energy of the species in gas phase.

2-Phenoxy-1-phenylethanol adsorbing on the surfaces of RuMo(9:1) and pure Ru



were optimized and simulated with similar methods. Results were summarized in Table S7. Atom coordinates of measured models were described in Table S8-S11.

**Figure S13**

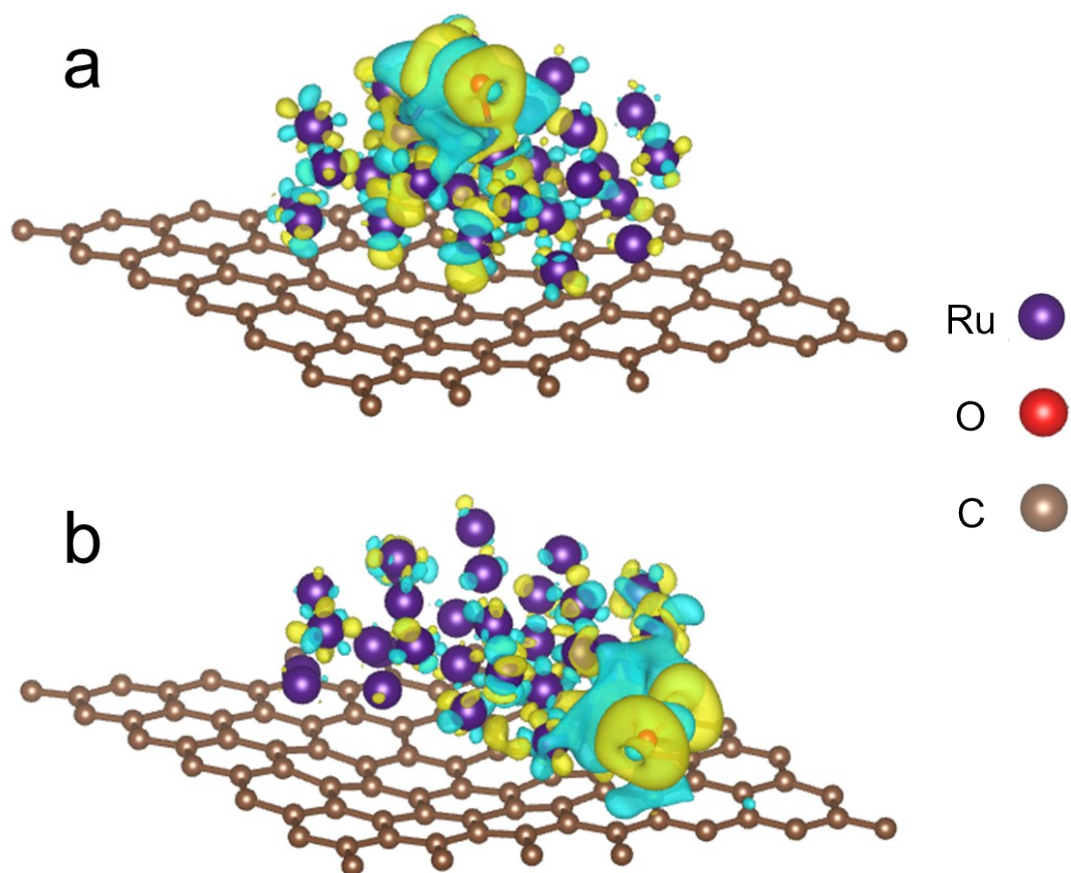

**Figure S13** Different charge distributions of molecular oxygen adsorbing on (a) top of the Ru nanoparticle, and (b) at interface of Ru nanoparticles and rGO calculated by DFT. The model RuMo alloy nanoparticle is consisted of 30 Ru atoms to simulate the structure of Ru/rGO. Electron accumulation and depletion are represented in yellow and cyan, respectively.

**Table S7**

**Table S7** Adsorption energy of 2-phenoxy-1-phenylethanol on RuMo and pure Ru surface.

| Surface               | Pure Ru | RuMo (9:1) |
|-----------------------|---------|------------|
| $E_{\text{ads}} / eV$ | -2.89   | -3.43      |

**Table S8****Table S8** Coordinates for the optimized structure of Ru:Mo(9:1)-top model

| <b>Atom</b> | <b>x</b> | <b>y</b> | <b>z</b> | <b>Atom</b> | <b>x</b> | <b>y</b> | <b>z</b> |
|-------------|----------|----------|----------|-------------|----------|----------|----------|
| C1          | 0.38633  | 0.09796  | 0.06729  | C53         | 0.49733  | 0.65502  | 0.04848  |
| C2          | 0.6647   | 0.15331  | 0.0712   | C54         | 0.55369  | 0.7654   | 0.05446  |
| C3          | 0.49764  | 0.98829  | 0.07255  | C55         | 0.22075  | 0.26443  | 0.0664   |
| C4          | 0.55336  | 0.09834  | 0.06982  | C56         | 0.66502  | 0.65472  | 0.04494  |
| C5          | 0.66553  | 0.98724  | 0.07188  | C57         | 0.72068  | 0.76575  | 0.05103  |
| C6          | 0.72046  | 0.09861  | 0.07338  | C58         | 0.83029  | 0.6544   | 0.0631   |
| C7          | 0.83139  | 0.98714  | 0.0651   | C59         | 0.38703  | 0.93326  | 0.07416  |
| C8          | 0.88657  | 0.09779  | 0.07155  | C60         | 0.88663  | 0.76532  | 0.06274  |
| C9          | 0.72055  | 0.26429  | 0.07007  | C61         | 0.33064  | 0.1539   | 0.06434  |
| C10         | 0.22026  | 0.09823  | 0.06685  | C62         | 0.05321  | 0.93134  | 0.0686   |
| C11         | 0.83129  | 0.15331  | 0.07429  | C63         | 0.83164  | 0.82117  | 0.05726  |
| C12         | 0.8866   | 0.26409  | 0.07697  | C64         | 0.99703  | 0.65462  | 0.08207  |
| C13         | 0.99747  | 0.15312  | 0.07295  | C65         | 0.0527   | 0.76552  | 0.07763  |
| C14         | 0.05285  | 0.26398  | 0.07678  | C66         | 0.16373  | 0.82089  | 0.07849  |
| C15         | 0.165    | 0.31993  | 0.07378  | C67         | 0.49933  | 0.82041  | 0.06848  |
| C16         | 0.22145  | 0.43181  | 0.07087  | C68         | 0.55393  | 0.9321   | 0.07318  |
| C17         | 0.33034  | 0.32042  | 0.05777  | C69         | 0.88704  | 0.93188  | 0.06224  |
| C18         | 0.38613  | 0.432    | 0.05192  | C70         | 0.99748  | 0.82071  | 0.06988  |
| C19         | 0.4978   | 0.32191  | 0.05739  | C71         | 0.16433  | 0.9869   | 0.07002  |
| C20         | 0.55408  | 0.4333   | 0.04698  | C72         | 0.33094  | 0.98778  | 0.07175  |
| C21         | 0.66551  | 0.32041  | 0.06261  | Mo1         | 0.24475  | 0.40501  | 0.29316  |

|     |         |         |         |      |         |         |         |
|-----|---------|---------|---------|------|---------|---------|---------|
| C22 | 0.21949 | 0.93171 | 0.07326 | Mo2  | 0.46282 | 0.81678 | 0.2628  |
| C23 | 0.72001 | 0.43263 | 0.05967 | Mo3  | 0.66567 | 0.60142 | 0.28659 |
| C24 | 0.83164 | 0.31989 | 0.07508 | O1   | 0.51271 | 0.53751 | 0.37552 |
| C25 | 0.88692 | 0.43135 | 0.07764 | O2   | 0.62213 | 0.57452 | 0.37155 |
| C26 | 0.99785 | 0.98721 | 0.06645 | Ru1  | 0.34407 | 0.48383 | 0.20266 |
| C27 | 0.99711 | 0.31935 | 0.07925 | Ru2  | 0.35436 | 0.30782 | 0.30616 |
| C28 | 0.66481 | 0.82087 | 0.05486 | Ru3  | 0.43522 | 0.3858  | 0.20935 |
| C29 | 0.05243 | 0.4308  | 0.08224 | Ru4  | 0.52761 | 0.30399 | 0.15385 |
| C30 | 0.16428 | 0.48596 | 0.07939 | Ru5  | 0.72907 | 0.39204 | 0.14779 |
| C31 | 0.22092 | 0.59826 | 0.08223 | Ru6  | 0.35466 | 0.78996 | 0.17003 |
| C32 | 0.33196 | 0.48764 | 0.05801 | Ru7  | 0.35113 | 0.61779 | 0.27952 |
| C33 | 0.38636 | 0.59872 | 0.05667 | Ru8  | 0.4572  | 0.69717 | 0.18952 |
| C34 | 0.38564 | 0.26492 | 0.05894 | Ru9  | 0.55339 | 0.59061 | 0.20027 |
| C35 | 0.49751 | 0.48793 | 0.04471 | Ru10 | 0.55614 | 0.38843 | 0.29069 |
| C36 | 0.55324 | 0.59924 | 0.04304 | Ru11 | 0.64382 | 0.47579 | 0.19903 |
| C37 | 0.0534  | 0.09799 | 0.06949 | Ru12 | 0.75881 | 0.49359 | 0.27962 |
| C38 | 0.6647  | 0.48869 | 0.04825 | Ru13 | 0.84142 | 0.58443 | 0.18151 |
| C39 | 0.49705 | 0.15292 | 0.06702 | Ru14 | 0.43693 | 0.22562 | 0.2379  |
| C40 | 0.72063 | 0.59912 | 0.04924 | Ru15 | 0.56616 | 0.89103 | 0.16755 |
| C41 | 0.83032 | 0.48684 | 0.07293 | Ru16 | 0.55902 | 0.71443 | 0.27984 |
| C42 | 0.88508 | 0.5993  | 0.07719 | Ru17 | 0.65617 | 0.78959 | 0.18917 |
| C43 | 0.99747 | 0.48707 | 0.08283 | Ru18 | 0.75051 | 0.68236 | 0.19408 |
| C44 | 0.05291 | 0.59861 | 0.08425 | Ru19 | 0.75686 | 0.79504 | 0.27988 |
| C45 | 0.16373 | 0.65406 | 0.08425 | Ru20 | 0.16404 | 0.40001 | 0.16245 |

|     |         |         |         |      |         |         |         |
|-----|---------|---------|---------|------|---------|---------|---------|
| C46 | 0.33137 | 0.82165 | 0.07852 | Ru21 | 0.86165 | 0.68507 | 0.27387 |
| C47 | 0.16481 | 0.15381 | 0.06784 | Ru22 | 0.25861 | 0.71586 | 0.26165 |
| C48 | 0.21912 | 0.76526 | 0.08208 | Ru23 | 0.45025 | 0.49879 | 0.29436 |
| C49 | 0.3314  | 0.6527  | 0.07029 | Ru24 | 0.6602  | 0.91212 | 0.26425 |
| C50 | 0.72075 | 0.93166 | 0.06415 | Ru25 | 0.23461 | 0.2916  | 0.21835 |
| C51 | 0.38699 | 0.76459 | 0.07388 | Ru26 | 0.14811 | 0.47882 | 0.26599 |
| C52 | 0.55272 | 0.26469 | 0.06321 | Ru27 | 0.25632 | 0.59587 | 0.18319 |

**Table S9 Coordinates for the optimized structure of Ru:Mo(9:1)-interface model**

| Atom | x       | y       | z       | Atom | x       | y       | z       |
|------|---------|---------|---------|------|---------|---------|---------|
| C1   | 0.38633 | 0.09796 | 0.06729 | C53  | 0.49733 | 0.65502 | 0.04848 |
| C2   | 0.6647  | 0.15331 | 0.0712  | C54  | 0.55369 | 0.7654  | 0.05446 |
| C3   | 0.49764 | 0.98829 | 0.07255 | C55  | 0.22075 | 0.26443 | 0.0664  |
| C4   | 0.55336 | 0.09834 | 0.06982 | C56  | 0.66502 | 0.65472 | 0.04494 |
| C5   | 0.66553 | 0.98724 | 0.07188 | C57  | 0.72068 | 0.76575 | 0.05103 |
| C6   | 0.72046 | 0.09861 | 0.07338 | C58  | 0.83029 | 0.6544  | 0.0631  |
| C7   | 0.83139 | 0.98714 | 0.0651  | C59  | 0.38703 | 0.93326 | 0.07416 |
| C8   | 0.88657 | 0.09779 | 0.07155 | C60  | 0.88663 | 0.76532 | 0.06274 |
| C9   | 0.72055 | 0.26429 | 0.07007 | C61  | 0.33064 | 0.1539  | 0.06434 |
| C10  | 0.22026 | 0.09823 | 0.06685 | C62  | 0.05321 | 0.93134 | 0.0686  |
| C11  | 0.83129 | 0.15331 | 0.07429 | C63  | 0.83164 | 0.82117 | 0.05726 |
| C12  | 0.8866  | 0.26409 | 0.07697 | C64  | 0.99703 | 0.65462 | 0.08207 |
| C13  | 0.99747 | 0.15312 | 0.07295 | C65  | 0.0527  | 0.76552 | 0.07763 |
| C14  | 0.05285 | 0.26398 | 0.07678 | C66  | 0.16373 | 0.82089 | 0.07849 |

|     |         |         |         |      |         |         |         |
|-----|---------|---------|---------|------|---------|---------|---------|
| C15 | 0.165   | 0.31993 | 0.07378 | C67  | 0.49933 | 0.82041 | 0.06848 |
| C16 | 0.22145 | 0.43181 | 0.07087 | C68  | 0.55393 | 0.9321  | 0.07318 |
| C17 | 0.33034 | 0.32042 | 0.05777 | C69  | 0.88704 | 0.93188 | 0.06224 |
| C18 | 0.38613 | 0.432   | 0.05192 | C70  | 0.99748 | 0.82071 | 0.06988 |
| C19 | 0.4978  | 0.32191 | 0.05739 | C71  | 0.16433 | 0.9869  | 0.07002 |
| C20 | 0.55408 | 0.4333  | 0.04698 | C72  | 0.33094 | 0.98778 | 0.07175 |
| C21 | 0.66551 | 0.32041 | 0.06261 | Mo1  | 0.24475 | 0.40501 | 0.29316 |
| C22 | 0.21949 | 0.93171 | 0.07326 | Mo2  | 0.46282 | 0.81678 | 0.2628  |
| C23 | 0.72001 | 0.43263 | 0.05967 | Mo3  | 0.66567 | 0.60142 | 0.28659 |
| C24 | 0.83164 | 0.31989 | 0.07508 | O1   | 0.4541  | 0.94893 | 0.25905 |
| C25 | 0.88692 | 0.43135 | 0.07764 | O2   | 0.45463 | 0.95747 | 0.19528 |
| C26 | 0.99785 | 0.98721 | 0.06645 | Ru1  | 0.34407 | 0.48383 | 0.20266 |
| C27 | 0.99711 | 0.31935 | 0.07925 | Ru2  | 0.35436 | 0.30782 | 0.30616 |
| C28 | 0.66481 | 0.82087 | 0.05486 | Ru3  | 0.43522 | 0.3858  | 0.20935 |
| C29 | 0.05243 | 0.4308  | 0.08224 | Ru4  | 0.52761 | 0.30399 | 0.15385 |
| C30 | 0.16428 | 0.48596 | 0.07939 | Ru5  | 0.72907 | 0.39204 | 0.14779 |
| C31 | 0.22092 | 0.59826 | 0.08223 | Ru6  | 0.35466 | 0.78996 | 0.17003 |
| C32 | 0.33196 | 0.48764 | 0.05801 | Ru7  | 0.35113 | 0.61779 | 0.27952 |
| C33 | 0.38636 | 0.59872 | 0.05667 | Ru8  | 0.4572  | 0.69717 | 0.18952 |
| C34 | 0.38564 | 0.26492 | 0.05894 | Ru9  | 0.55339 | 0.59061 | 0.20027 |
| C35 | 0.49751 | 0.48793 | 0.04471 | Ru10 | 0.55614 | 0.38843 | 0.29069 |
| C36 | 0.55324 | 0.59924 | 0.04304 | Ru11 | 0.64382 | 0.47579 | 0.19903 |
| C37 | 0.0534  | 0.09799 | 0.06949 | Ru12 | 0.75881 | 0.49359 | 0.27962 |
| C38 | 0.6647  | 0.48869 | 0.04825 | Ru13 | 0.84142 | 0.58443 | 0.18151 |

|     |         |         |         |      |         |         |         |
|-----|---------|---------|---------|------|---------|---------|---------|
| C39 | 0.49705 | 0.15292 | 0.06702 | Ru14 | 0.43693 | 0.22562 | 0.2379  |
| C40 | 0.72063 | 0.59912 | 0.04924 | Ru15 | 0.56616 | 0.89103 | 0.16755 |
| C41 | 0.83032 | 0.48684 | 0.07293 | Ru16 | 0.55902 | 0.71443 | 0.27984 |
| C42 | 0.88508 | 0.5993  | 0.07719 | Ru17 | 0.65617 | 0.78959 | 0.18917 |
| C43 | 0.99747 | 0.48707 | 0.08283 | Ru18 | 0.75051 | 0.68236 | 0.19408 |
| C44 | 0.05291 | 0.59861 | 0.08425 | Ru19 | 0.75686 | 0.79504 | 0.27988 |
| C45 | 0.16373 | 0.65406 | 0.08425 | Ru20 | 0.16404 | 0.40001 | 0.16245 |
| C46 | 0.33137 | 0.82165 | 0.07852 | Ru21 | 0.86165 | 0.68507 | 0.27387 |
| C47 | 0.16481 | 0.15381 | 0.06784 | Ru22 | 0.25861 | 0.71586 | 0.26165 |
| C48 | 0.21912 | 0.76526 | 0.08208 | Ru23 | 0.45025 | 0.49879 | 0.29436 |
| C49 | 0.3314  | 0.6527  | 0.07029 | Ru24 | 0.6602  | 0.91212 | 0.26425 |
| C50 | 0.72075 | 0.93166 | 0.06415 | Ru25 | 0.23461 | 0.2916  | 0.21835 |
| C51 | 0.38699 | 0.76459 | 0.07388 | Ru26 | 0.14811 | 0.47882 | 0.26599 |
| C52 | 0.55272 | 0.26469 | 0.06321 | Ru27 | 0.25632 | 0.59587 | 0.18319 |



**Table S10****Table S10** Coordinates for the optimized structure of Pure Ru-top model

| Atom | x       | y       | z       | Atom | x       | y       | z       |
|------|---------|---------|---------|------|---------|---------|---------|
| C1   | 0.71991 | 0.26409 | 0.07045 | C53  | 0.71984 | 0.76552 | 0.05203 |
| C2   | 0.21937 | 0.09799 | 0.06533 | C54  | 0.66467 | 0.98677 | 0.07313 |
| C3   | 0.83045 | 0.15301 | 0.07439 | C55  | 0.82955 | 0.6543  | 0.06411 |
| C4   | 0.88592 | 0.26391 | 0.07655 | C56  | 0.38619 | 0.93316 | 0.07438 |
| C5   | 0.9966  | 0.15284 | 0.07191 | C57  | 0.88596 | 0.76534 | 0.0635  |
| C6   | 0.052   | 0.26377 | 0.07534 | C58  | 0.32985 | 0.15382 | 0.06369 |
| C7   | 0.16381 | 0.31952 | 0.0716  | C59  | 0.83094 | 0.82099 | 0.05789 |
| C8   | 0.22039 | 0.43146 | 0.06996 | C60  | 0.99628 | 0.65464 | 0.08315 |
| C9   | 0.32971 | 0.32034 | 0.05684 | C61  | 0.05195 | 0.76559 | 0.07839 |
| C10  | 0.3854  | 0.43183 | 0.05137 | C62  | 0.33001 | 0.98763 | 0.07144 |
| C11  | 0.49713 | 0.32185 | 0.05888 | C63  | 0.1629  | 0.82094 | 0.07879 |
| C12  | 0.55325 | 0.43314 | 0.04829 | C64  | 0.49832 | 0.82041 | 0.06791 |
| C13  | 0.66469 | 0.3203  | 0.06379 | C65  | 0.71976 | 0.09835 | 0.07409 |
| C14  | 0.21861 | 0.93154 | 0.07263 | C66  | 0.55315 | 0.93171 | 0.07354 |
| C15  | 0.71915 | 0.43254 | 0.06067 | C67  | 0.88632 | 0.93169 | 0.06246 |
| C16  | 0.83095 | 0.31975 | 0.07503 | C68  | 0.99677 | 0.82071 | 0.07016 |
| C17  | 0.8863  | 0.4312  | 0.0777  | C69  | 0.38545 | 0.09792 | 0.06723 |
| C18  | 0.99714 | 0.98708 | 0.06581 | C70  | 0.66405 | 0.15314 | 0.0717  |
| C19  | 0.99627 | 0.31915 | 0.07821 | C71  | 0.83055 | 0.98682 | 0.06572 |
| C20  | 0.66404 | 0.82069 | 0.0558  | C72  | 0.8858  | 0.09756 | 0.07156 |

|     |         |         |         |      |         |         |         |
|-----|---------|---------|---------|------|---------|---------|---------|
| C21 | 0.05164 | 0.43061 | 0.08123 | O1   | 0.56416 | 0.57736 | 0.36107 |
| C22 | 0.1632  | 0.4856  | 0.07824 | O2   | 0.57093 | 0.68052 | 0.36405 |
| C23 | 0.21984 | 0.59791 | 0.08112 | Ru1  | 0.65992 | 0.90849 | 0.26444 |
| C24 | 0.3311  | 0.48752 | 0.05728 | Ru2  | 0.23412 | 0.29747 | 0.21703 |
| C25 | 0.38541 | 0.59849 | 0.05618 | Ru3  | 0.15202 | 0.48152 | 0.25902 |
| C26 | 0.55193 | 0.2645  | 0.06429 | Ru4  | 0.26025 | 0.59736 | 0.1793  |
| C27 | 0.38498 | 0.26492 | 0.05897 | Ru5  | 0.35072 | 0.48656 | 0.20187 |
| C28 | 0.49674 | 0.48779 | 0.04522 | Ru6  | 0.35592 | 0.3052  | 0.30789 |
| C29 | 0.55238 | 0.59911 | 0.04362 | Ru7  | 0.43424 | 0.38066 | 0.21048 |
| C30 | 0.05255 | 0.09786 | 0.06812 | Ru8  | 0.53135 | 0.30324 | 0.1563  |
| C31 | 0.66371 | 0.48866 | 0.04956 | Ru9  | 0.72967 | 0.39493 | 0.14874 |
| C32 | 0.4969  | 0.98811 | 0.07306 | Ru10 | 0.36004 | 0.79242 | 0.16908 |
| C33 | 0.49636 | 0.15288 | 0.0678  | Ru11 | 0.34703 | 0.61476 | 0.2784  |
| C34 | 0.71974 | 0.59903 | 0.05033 | Ru12 | 0.4592  | 0.69594 | 0.18948 |
| C35 | 0.82977 | 0.48679 | 0.07331 | Ru13 | 0.25737 | 0.41136 | 0.29475 |
| C36 | 0.88455 | 0.59932 | 0.07759 | Ru14 | 0.46207 | 0.81204 | 0.26446 |
| C37 | 0.05252 | 0.9313  | 0.06793 | Ru15 | 0.66446 | 0.60065 | 0.2867  |
| C38 | 0.99679 | 0.48689 | 0.08251 | Ru16 | 0.55338 | 0.59016 | 0.20102 |
| C39 | 0.05215 | 0.59845 | 0.08456 | Ru17 | 0.55409 | 0.39534 | 0.29389 |
| C40 | 0.16268 | 0.6538  | 0.08425 | Ru18 | 0.64654 | 0.4767  | 0.20195 |
| C41 | 0.3303  | 0.82153 | 0.07854 | Ru19 | 0.76808 | 0.50108 | 0.2795  |
| C42 | 0.16382 | 0.15356 | 0.06601 | Ru20 | 0.84474 | 0.58786 | 0.1813  |
| C43 | 0.55264 | 0.0981  | 0.07049 | Ru21 | 0.44094 | 0.22565 | 0.24159 |
| C44 | 0.21829 | 0.76522 | 0.08256 | Ru22 | 0.56286 | 0.88989 | 0.16938 |

|     |         |         |         |      |         |         |         |
|-----|---------|---------|---------|------|---------|---------|---------|
| C45 | 0.33033 | 0.65239 | 0.07005 | Ru23 | 0.56409 | 0.71222 | 0.28004 |
| C46 | 0.71999 | 0.93131 | 0.06516 | Ru24 | 0.65626 | 0.78967 | 0.18778 |
| C47 | 0.38606 | 0.76463 | 0.07397 | Ru25 | 0.7505  | 0.6813  | 0.19325 |
| C48 | 0.49648 | 0.65496 | 0.04855 | Ru26 | 0.75942 | 0.79685 | 0.27641 |
| C49 | 0.55272 | 0.76536 | 0.05465 | Ru27 | 0.16695 | 0.39856 | 0.16284 |
| C50 | 0.16354 | 0.9868  | 0.06882 | Ru28 | 0.86165 | 0.68801 | 0.27419 |
| C51 | 0.2197  | 0.26421 | 0.06443 | Ru29 | 0.25587 | 0.70979 | 0.25833 |
| C52 | 0.66408 | 0.65452 | 0.04593 | Ru30 | 0.45489 | 0.49632 | 0.29408 |

**Table S11****Table S11** Coordinates for the optimized structure of Pure Ru-interface model

| <b>Atom</b> | <b>x</b> | <b>y</b> | <b>z</b> | <b>Atom</b> | <b>x</b> | <b>y</b> | <b>z</b> |
|-------------|----------|----------|----------|-------------|----------|----------|----------|
| C1          | 0.66469  | 0.3203   | 0.06379  | C53         | 0.99628  | 0.65464  | 0.08315  |
| C2          | 0.21861  | 0.93154  | 0.07263  | C54         | 0.32971  | 0.32034  | 0.05684  |
| C3          | 0.71915  | 0.43254  | 0.06067  | C55         | 0.05195  | 0.76559  | 0.07839  |
| C4          | 0.83095  | 0.31975  | 0.07503  | C56         | 0.33001  | 0.98763  | 0.07144  |
| C5          | 0.8863   | 0.4312   | 0.0777   | C57         | 0.1629   | 0.82094  | 0.07879  |
| C6          | 0.99714  | 0.98708  | 0.06581  | C58         | 0.49832  | 0.82041  | 0.06791  |
| C7          | 0.99627  | 0.31915  | 0.07821  | C59         | 0.71976  | 0.09835  | 0.07409  |
| C8          | 0.66404  | 0.82069  | 0.0558   | C60         | 0.55315  | 0.93171  | 0.07354  |
| C9          | 0.05164  | 0.43061  | 0.08123  | C61         | 0.88632  | 0.93169  | 0.06246  |
| C10         | 0.1632   | 0.4856   | 0.07824  | C62         | 0.88592  | 0.26391  | 0.07655  |
| C11         | 0.21984  | 0.59791  | 0.08112  | C63         | 0.99677  | 0.82071  | 0.07016  |
| C12         | 0.3311   | 0.48752  | 0.05728  | C64         | 0.38545  | 0.09792  | 0.06723  |
| C13         | 0.38541  | 0.59849  | 0.05618  | C65         | 0.3854   | 0.43183  | 0.05137  |
| C14         | 0.55193  | 0.2645   | 0.06429  | C66         | 0.66405  | 0.15314  | 0.0717   |
| C15         | 0.38498  | 0.26492  | 0.05897  | C67         | 0.83055  | 0.98682  | 0.06572  |
| C16         | 0.49674  | 0.48779  | 0.04522  | C68         | 0.8858   | 0.09756  | 0.07156  |
| C17         | 0.55238  | 0.59911  | 0.04362  | C69         | 0.9966   | 0.15284  | 0.07191  |
| C18         | 0.05255  | 0.09786  | 0.06812  | C70         | 0.052    | 0.26377  | 0.07534  |
| C19         | 0.66371  | 0.48866  | 0.04956  | C71         | 0.49713  | 0.32185  | 0.05888  |
| C20         | 0.4969   | 0.98811  | 0.07306  | C72         | 0.55325  | 0.43314  | 0.04829  |

|     |         |         |         |      |         |         |         |
|-----|---------|---------|---------|------|---------|---------|---------|
| C21 | 0.49636 | 0.15288 | 0.0678  | Mo1  | 0.43922 | 0.98319 | 0.18967 |
| C22 | 0.71974 | 0.59903 | 0.05033 | Mo2  | 0.33811 | 0.90415 | 0.20344 |
| C23 | 0.82977 | 0.48679 | 0.07331 | Mo3  | 0.6644  | 0.6014  | 0.2867  |
| C24 | 0.88455 | 0.59932 | 0.07759 | O1   | 0.55338 | 0.59016 | 0.20102 |
| C25 | 0.05252 | 0.9313  | 0.06793 | O2   | 0.55409 | 0.39534 | 0.29389 |
| C26 | 0.71991 | 0.26409 | 0.07045 | Ru1  | 0.64654 | 0.4767  | 0.20195 |
| C27 | 0.99679 | 0.48689 | 0.08251 | Ru2  | 0.76808 | 0.50108 | 0.2795  |
| C28 | 0.05215 | 0.59845 | 0.08456 | Ru3  | 0.84474 | 0.58786 | 0.1813  |
| C29 | 0.16268 | 0.6538  | 0.08425 | Ru4  | 0.44094 | 0.22565 | 0.24159 |
| C30 | 0.3303  | 0.82153 | 0.07854 | Ru5  | 0.56286 | 0.88989 | 0.16938 |
| C31 | 0.16382 | 0.15356 | 0.06601 | Ru6  | 0.56409 | 0.71222 | 0.28004 |
| C32 | 0.16381 | 0.31952 | 0.0716  | Ru7  | 0.65626 | 0.78967 | 0.18778 |
| C33 | 0.55264 | 0.0981  | 0.07049 | Ru8  | 0.7505  | 0.6813  | 0.19325 |
| C34 | 0.21829 | 0.76522 | 0.08256 | Ru9  | 0.75942 | 0.79685 | 0.27641 |
| C35 | 0.33033 | 0.65239 | 0.07005 | Ru10 | 0.16695 | 0.39856 | 0.16284 |
| C36 | 0.71999 | 0.93131 | 0.06516 | Ru11 | 0.86165 | 0.68801 | 0.27419 |
| C37 | 0.38606 | 0.76463 | 0.07397 | Ru12 | 0.25587 | 0.70979 | 0.25833 |
| C38 | 0.21937 | 0.09799 | 0.06533 | Ru13 | 0.45489 | 0.49632 | 0.29408 |
| C39 | 0.49648 | 0.65496 | 0.04855 | Ru14 | 0.65992 | 0.90849 | 0.26444 |
| C40 | 0.55272 | 0.76536 | 0.05465 | Ru15 | 0.23412 | 0.29747 | 0.21703 |
| C41 | 0.16354 | 0.9868  | 0.06882 | Ru16 | 0.15202 | 0.48152 | 0.25902 |
| C42 | 0.2197  | 0.26421 | 0.06443 | Ru17 | 0.26025 | 0.59736 | 0.1793  |
| C43 | 0.22039 | 0.43146 | 0.06996 | Ru18 | 0.35072 | 0.48656 | 0.20187 |
| C44 | 0.66408 | 0.65452 | 0.04593 | Ru19 | 0.35592 | 0.3052  | 0.30789 |

|     |         |         |         |      |         |         |         |
|-----|---------|---------|---------|------|---------|---------|---------|
| C45 | 0.71984 | 0.76552 | 0.05203 | Ru20 | 0.43424 | 0.38066 | 0.21048 |
| C46 | 0.66467 | 0.98677 | 0.07313 | Ru21 | 0.53135 | 0.30324 | 0.1563  |
| C47 | 0.82955 | 0.6543  | 0.06411 | Ru22 | 0.72967 | 0.39493 | 0.14874 |
| C48 | 0.38619 | 0.93316 | 0.07438 | Ru23 | 0.36004 | 0.79242 | 0.16908 |
| C49 | 0.88596 | 0.76534 | 0.0635  | Ru24 | 0.34703 | 0.61476 | 0.2784  |
| C50 | 0.83045 | 0.15301 | 0.07439 | Ru25 | 0.4592  | 0.69594 | 0.18948 |
| C51 | 0.32985 | 0.15382 | 0.06369 | Ru26 | 0.25737 | 0.41136 | 0.29475 |
| C52 | 0.83094 | 0.82099 | 0.05789 | Ru27 | 0.46207 | 0.81204 | 0.26446 |

**Table S12****Table S12** Comprehensive GC×GC TOF-MS measurement conditions

| GC             |                                    | SSM                             |        | TOF-MS                           |             |
|----------------|------------------------------------|---------------------------------|--------|----------------------------------|-------------|
| Column oven    | 70, 2 min; 2 °C/min, 300°C, 10 min | Inlet temperature <sup>a</sup>  | +0 °C  | Ion source temperature           | 230 °C      |
| Carrier gas    | He (99.999%)                       | Outlet temperature <sup>a</sup> | +30 °C | MS transmission line temperature | 280 °C      |
| Flow rate      | 1.1 mL·min <sup>-1</sup>           | Cold sector temperature         | -51 °C | Ionization voltage               | -70 eV      |
| Injection port | 300 °C                             | Modulation period               | 5 s    | Mass range                       | 40-1200 amu |
| Sample volume  | 1 mL                               |                                 |        | Scan rate                        | 50 times /s |
| Split ratio    | 20:1                               |                                 |        |                                  |             |

<sup>a</sup> Relative to GC column temperature.

**Figure S14**

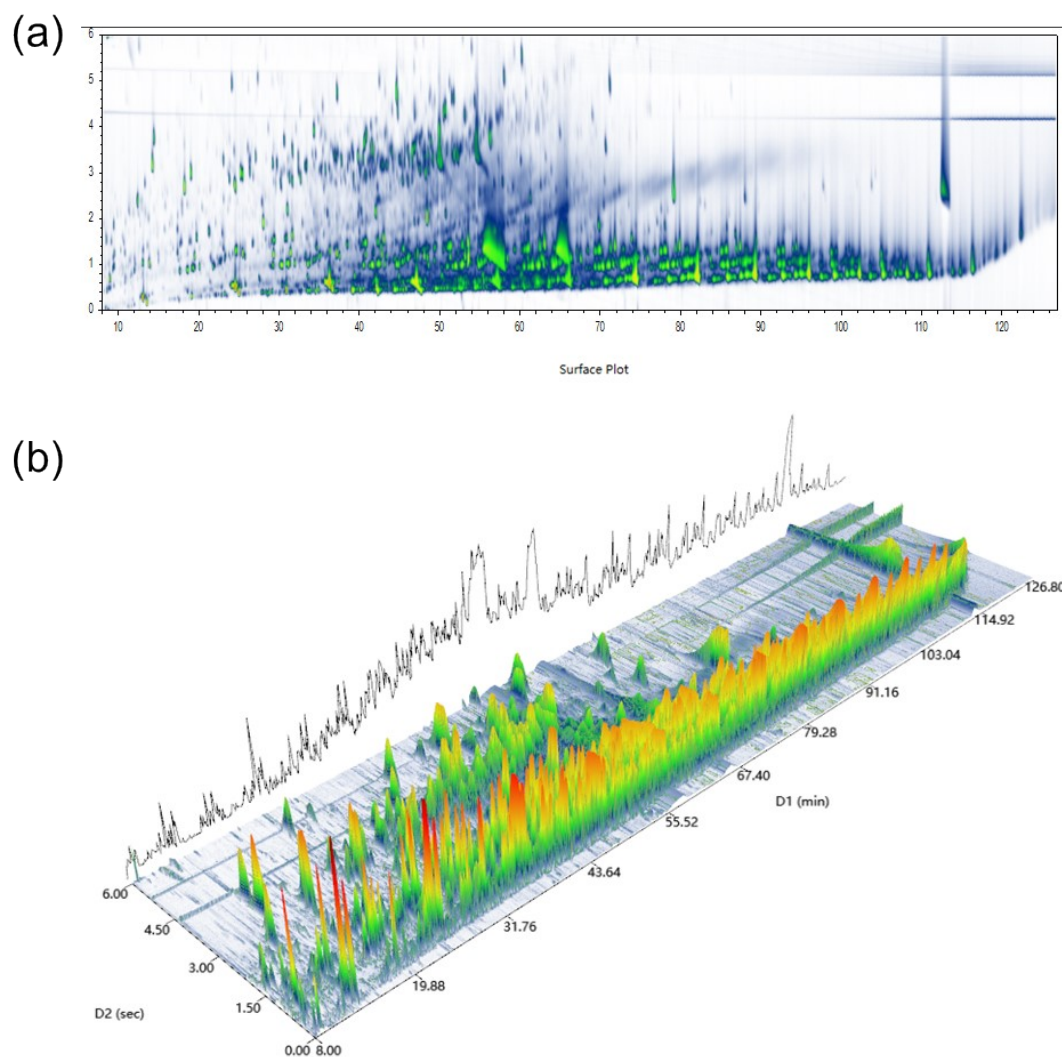

**Figure S14.** Comprehensive GCxGC TOF-MS spectra of 2d view (a) and 3d view (b) of lignin depolymerization products catalyzed by RuMo/rGO(10-1). Conditions: 1 mg RuMo/rGO(10-1), 10 mg previously prepared organosolv lignin powder, 0.3 MPa O<sub>2</sub>, 100°C, 12h, pH=12. Sample was pre-extracted with ethyl acetate and n-hexane before GCxGC TOF-MS measurement. Products were RI calibrated by nC7-nC35 n-alkanes and then identified by the NIST 17 mass spectral library.



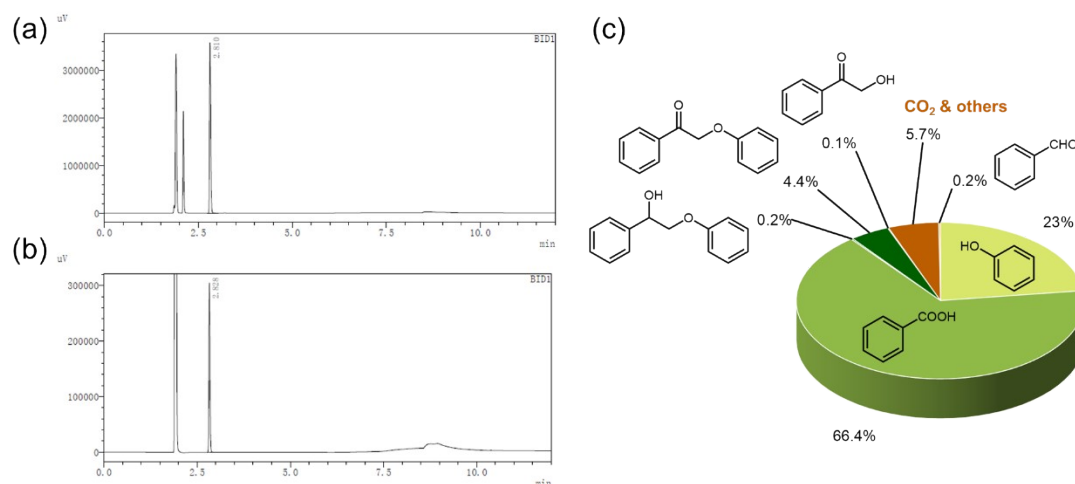

**Figure S15.** The corresponding GC-MS data of the (a) CO<sub>2</sub> standard sample (CO<sub>2</sub> containing 9.81%, at  $t_R = 2.8$  min) and (b) gaseous atmosphere of the oxidative cleavage reaction of 2-phenoxy-1-phenylethanol using RuMo/rGO(10-1) as catalyst; (c) the as-estimated carbon balance of the reaction. Reaction conditions: 0.2 mg RuMo/rGO(10-1) 0.01 mmol 2-phenoxy-1-phenylethanol, 0.3 MPa O<sub>2</sub>, 100 °C, 12 h, pH = 12.

**Table S13** Conversion and yield of the 5 times larger scaled reaction of oxidative cleavage of 2-phenoxy-1-phenylethanol

| Conversion<br>/% | Yield / % |              |                                      |                               |        |
|------------------|-----------|--------------|--------------------------------------|-------------------------------|--------|
|                  | Phenol    | Benzoic acid | 2-phenoxy- 1-<br>phenylethanol-1-one | $\alpha$ -hydroxyacetophenone | others |
| 99               | 77        | 75           | 21                                   | 2                             | <1     |

**Table S14** RuMo/rGO(10-1) catalyst recover mass in each run for the reuseability assessment experiments.

| Cycle time(s) | Catalyst mass / mg | Absorbance / a.u. |
|---------------|--------------------|-------------------|
| 0             | 0.2031             | 0.271             |
| 1             | 0.1863             | 0.249             |
| 2             | 0.1825             | 0.244             |
| 3             | 0.1710             | 0.229             |
| 4             | 0.1626             | 0.218             |
| 5             | 0.1596             | 0.214             |

<sup>a</sup>Acquired and calculated from a mass-to-absorbance standard curve from catalysts' absorbance in each run.

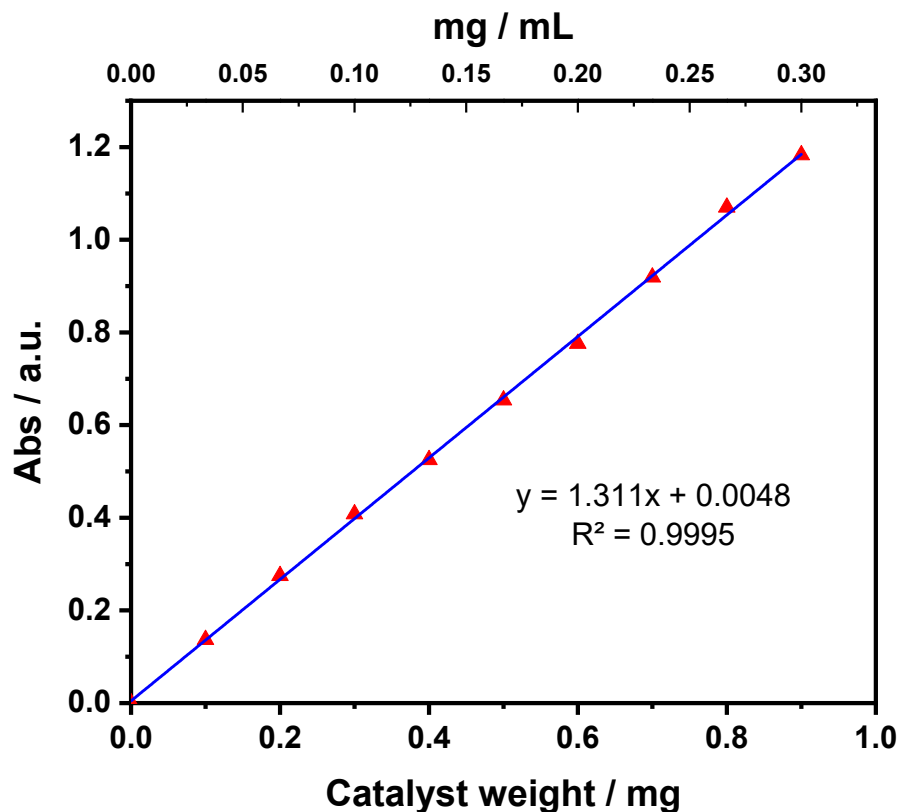

**Figure S16.** RuMo/rGO(10-1) catalyst weight(mg)-to-absorbance(a.u.) standard curve.

Measured at  $\lambda = 235$  nm in a 3 mL quartz cuvette.

## References

1. J. Zhang, H. Yang, G. Shen, P. Cheng, J. Zhang and S. Guo, *Chem. Commun. (Camb)*, 2010, **46**, 1112-1114.
2. J. Zhang, P. Lei, D. Yu, Y. Li, M. Zhong, W. Shen and S. Guo, *Chem.*, 2023, **29**, e202203144.
3. W.-L. Song, Q. Dong, L. Hong, Z.-Q. Tian, L.-N. Tang, W. Hao and H. Zhang, *RSC Adv.*, 2019, **9**, 31070-31077.
4. L. Zhao, S. Shi, G. Zhu, M. Liu, J. Gao and J. Xu, *Green Chem.*, 2019, **21**, 6707-6716.
5. W. Deng, H. Zhang, X. Wu, R. Li, Q. Zhang and Y. Wang, *Green Chem.*, 2015, **17**, 5009-5018.
6. S. Liu, L. Bai, A. P. van Muyden, Z. Huang, X. Cui, Z. Fei, X. Li, X. Hu and P. J. Dyson, *Green Chem.*, 2019, **21**, 1974-1981.
7. J. Liang, M. X. Wang, Y. P. Zhao, W. W. Yan, X. G. Si, G. Yu, J. P. Cao and X. Y. Wei, *ChemCatChem*, 2021, **13**, 3836-3845.
8. G. Kresse and J. Hafner, *Phys. Rev. B*, 1994, **49**, 14251-14269.

9. G. Kresse and J. Hafner, *Phys. Rev. B*, 1993, **47**, 558-561.
10. G. Kresse and J. Furthmüller, *Comp. Mater. Sci.*, 1996, **6**, 15-50.
11. G. Kresse and J. Furthmüller, *Phys. Rev. B*, 1996, **54**, 11169-11186.
12. J. P. Perdew, K. Burke and M. Ernzerhof, *Phys. Rev. Lett.*, 1996, **77**, 3865-3868.
13. G. Kresse and D. Joubert, *Phys. Rev. B*, 1999, **59**, 1758-1775.
14. P. E. Blöchl, *Phys. Rev. B*, 1994, **50**, 17953-17979.
